# Supplementary material for: Ability of combined soluble urokinase plasminogen activator receptor to predict preventable emergency attendance in older patients in Japan: a prospective pilot study
Source: PeerJ. 2022 Nov 4;10:e14322. doi: 10.7717/peerj.14322 (PMC9639425; doi:10.7717/peerj.14322)
Supplement: Data S1 [file peerj-10-14322-s001.xlsx]

## Sheet: master sheet
Pt No.	gender	age	date of visiting ER	ADL(The level of care needed)	symptoms of chief complain																												Tall(m)	BW(kg)	BMI	comorbidity	comorbidity									Diagnostic category	Diagnosis	Laboratory Test
							pulmonology				gastroenterology				neurology								cardiology		nephrology		others					mental					pulmonology	cardiology	neurology	gastroenterology	endocrinology	nephrology	collagen disease	cancer	Charlson Comorbidity Index			WBC	Hb
					fever	shock	hypoxia	cough	bloody sputum/hemoptysis	SOB	stomach ache	nausea/vomit	Bloody stool	diarrhea	headache	convulsion	vertigo	syncope	disturbance of consciousness	paralysis	speech disorder	visual disorder	chest pain	palpitation	urinary retention	hematuria	taste disorder	fatigue	weakness	loss of appetite	body aches	anxiety
1	female	87	2020-09-16	long-term care level5	1	1	1	0	0	0	0	0	0	0	0	0	0	0	1	0	0	0	0	0	0	0	0	0	0	0	0	0	1.5	38.2	16.9778	HT, DM, dementia	0	1	1	0	1	0	0	0	6	nephrology	urinary tract infection	10900	18.7
2	female	87	2020-09-16	long-term care level2	1	0	1	0	0	0	0	0	0	0	0	0	0	0	0	0	0	0	0	0	0	0	0	0	0	0	0	0	1.42	39	19.3414	HT, DM, CI, dementia	0	1	1	0	1	0	0	0	7	nephrology	urinary tract infection	6600	12.1
3	female	94	2020-09-17	long-term care level3	0	1	0	0	0	0	0	0	0	0	0	0	0	1	0	0	0	0	0	0	0	0	0	0	0	0	0	0	1.53	40	17.0874	AD, HT, DL	0	1	1	0	1	0	0	0	6	others	neuromedic syncope s/p	5800	11.3
4	female	94	2020-09-24	long-term care level2	0	0	1	1	0	0	0	0	0	0	0	0	0	0	0	0	0	0	1	0	0	0	0	0	0	0	0	0	1.5	51	22.6667	HT, dementia	0	1	1	0	0	0	0	0	6	cardiology	heart failure	6300	11.9
5	female	84	2020-10-01	requiring help2	1	0	1	1	1	1	0	0	0	0	0	0	0	0	0	0	0	0	0	0	0	0	0	0	0	0	0	0	1.48	38	17.3484	IP, AV block, myeloma, MAC infection, dementia	1	1	1	0	0	0	0	1	9	pulmonology	pneumonia	10100	10.4
6	female	103	2020-10-02	long-term care level4	1	1	0	0	0	0	1	0	0	0	0	0	0	0	0	0	0	0	0	0	0	0	0	1	1	1	0	0	1.38	38	19.9538	dementia	0	0	1	0	0	0	0	0	5	nephrology	urinary tract infection	5900	9.8
7	female	97	2020-10-02	long-term care level2	1	1	1	0	0	0	1	0	0	1	0	0	0	0	0	0	0	0	0	0	0	0	0	1	1	1	0	0	1.39	37	19.1501	HT, dementia	0	1	1	0	0	0	0	0	5	gastroenterology	Liver tumor	25000	6.6
8	male	94	2020-10-07	long-term care level5	0	1	1	1	0	1	0	0	0	0	0	0	0	0	0	0	0	0	0	0	0	0	0	0	0	0	0	0	1.5	44.5	19.7778	HT, Celebral bleeding, Lung cancer	0	1	1	0	0	0	0	1	8	pulmonology	pneumonia	10500	13.8
9	female	86	2020-10-29	long-term care level4	0	0	1	0	0	1	0	0	0	0	0	0	0	0	0	0	0	0	0	0	0	0	0	0	0	0	0	0	1.44	43	20.7369	DM, dementia, parkinson disease, cancer, HT	0	1	1	0	0	0	0	1	8	cardiology	heart failure	7700	10.1
10	male	81	2020-11-17	independence	1	0	0	0	0	0	0	0	0	0	0	0	0	0	1	0	0	0	0	0	0	0	0	1	1	1	0	0	1.65	76	27.9155	HT, af, blodder cancer	0	0	0	0	0	1	0	1	6	nephrology	urinary tract infection	11600	18.4
11	female	88	2020-12-09	long-term care level5	1	0	0	0	0	0	0	0	0	0	0	0	0	0	1	0	0	0	0	0	0	0	0	1	1	1	0	0	1.41	35	17.6047	HT, dementia, rectal cancer, Af	0	1	1	0	0	0	0	1	7	others	emaciation	4700	13
12	female	85	2020-12-09	independence	1	0	1	0	0	1	0	0	0	0	0	0	0	0	0	0	0	0	0	0	0	0	0	0	0	0	0	0	1.49	60	27.0258	lung cancer	0	0	0	1	0	0	0	1	7	gastroenterology	liver tumor	11700	12.2
13	female	91	2020-12-09	long-term care level3	0	0	0	0	0	0	0	0	0	0	0	0	0	0	0	0	0	0	0	0	0	0	0	0	1	1	0	0	1.5	55	24.4444	HT, Af	0	1	0	0	0	0	0	0	4	cardiology	heart failure	5900	13.4
14	female	93	2020-12-10	long-term care level1	1	0	0	0	0	0	0	0	0	0	0	0	0	0	0	0	0	0	0	0	0	0	0	0	0	0	0	0	1.43	37	18.0938	HT, CKD, AD	0	1	1	0	0	1	0	0	5	nephrology	urinary tract infection	9400	10.5
15	female	93	2020-12-22	long-term care level1	0	0	1	0	0	1	0	0	0	0	0	0	0	0	0	0	0	0	0	0	0	0	0	0	0	0	0	0	1.4	30	15.3061	CHF, AF, dementia, DL, frequent urination	0	1	1	0	0	1	0	0	6	cardiology	heart failure	4200	11
16	male	89	2020-12-24	long-term care level1	1	1	1	0	0	1	0	0	0	0	0	0	0	0	0	0	0	0	0	0	0	0	0	0	0	0	0	0	1.54	42	17.7096	HT, DM, CHF, COPD	1	1	0	0	1	0	0	0	7	pulmonology	pneumonia	10400	12.2
17	female	87	2020-12-24	long-term care level2	0	0	1	0	0	1	0	0	0	0	0	0	0	0	0	0	0	0	0	0	0	0	0	0	0	0	0	0	1.57	66	26.7759	SAH, CHF, CKD, DM, dementia	1	1	1	0	1	0	0	0	7	pulmonology	Chronic respiratory failure	6800	14.3
18	female	96	2020-12-24	requiring help2	0	0	0	0	0	1	0	0	0	0	0	0	0	0	1	0	0	0	0	0	0	0	0	0	0	0	0	0	1.4	37	18.8776	non	0	0	0	0	0	0	0	0	4	others	non specific dyspnea	6300	10.8
19	female	90	2021-01-14	long-term care level3	1	0	1	1	0	1	0	0	0	0	0	0	0	0	0	0	0	0	0	0	0	0	0	0	0	0	0	0	1.4	39	19.898	Basedow, CHF, HT, dementia, pneumonia	1	1	1	1	0	0	0	0	7	pulmonology	pneumonia	13200	12.1
20	male	67	2021-01-18	independence	1	0	1	0	0	1	0	0	0	0	0	0	0	0	0	0	0	0	0	0	0	0	0	0	0	0	0	0	1.75	98	32	HT	0	1	0	0	0	0	0	0	2	pulmonology	COVID-19 pneumonia	6800	16.4
21	female	73	2021-01-20	independence	0	0	0	0	0	0	1	0	0	0	0	0	0	0	0	0	0	0	0	0	0	0	0	0	0	0	0	0	1.45	65	30.9156	HT, DM, DL, CI, UTI, ileus	0	1	1	1	1	1	0	0	6	gastroenterology	gallbladder stone	7200	12.2
22	female	86	2021-01-20	requiring help1	1	0	0	0	0	0	0	0	0	0	0	0	0	0	0	0	0	0	0	0	0	0	0	1	1	1	0	0	1.5	43	19.1111	HT, CHF	0	1	0	0	0	0	0	0	5	nephrology	urinary tract infection	5500	9.9
23	female	94	2021-01-26	long-term care level4	0	0	1	0	0	1	0	0	0	0	0	0	0	0	0	0	0	0	0	0	0	0	0	0	0	0	0	0	1.45	34	16.1712	dementia, CHF, Af, CI	0	1	1	0	0	0	0	0	7	pulmonology	pneumonia	3200	14.1
24	male	80	2021-02-03	long-term care level2	0	0	0	0	0	0	0	0	0	0	0	0	0	0	0	0	0	0	0	0	0	0	0	0	0	1	0	0	1.7	60	20.7612	dementia, CI, HT, DL, anemia	0	1	1	0	1	0	0	0	5	others	loss of appetite	3600	11.3
25	female	82	2021-02-03	long-term care level5	0	0	0	0	0	0	0	0	0	0	0	0	0	0	0	0	0	0	0	0	0	0	0	0	0	1	0	0	1.45	40	19.025	HT, parkinson, chronic pancreatitis	0	1	1	1	0	0	0	0	5	others	loss of appetite	3900	14.1
26	female	97	2021-02-12	long-term care level3	0	0	0	0	0	0	1	1	0	0	0	0	0	0	0	0	0	0	0	0	0	0	0	0	0	1	0	0	1.62	62	23.6244	HT	0	1	0	0	0	0	0	0	4	gastroenterology	cholangitis	16300	13.8
27	male	90	2021-02-24	long-term care level5	0	0	0	0	0	0	0	0	0	0	0	0	0	0	1	0	0	0	0	0	0	0	0	0	0	0	0	0	1.52	42	18.1787	CI, dementia, af	0	1	1	0	0	0	0	0	5	neurology	dementia	4200	11.3
28	female	91	2021-03-04	long-term care level5	1	1	1	1	0	1	0	0	0	0	0	0	0	0	0	0	0	0	0	0	0	0	0	0	0	0	0	0	1.46	29	13.6048	HT, dementia, rectal cancer, gastric cancer	0	1	1	1	0	0	0	1	7	pulmonology	pneumonia, UTI s/p	9100	11.4
29	male	86	2021-03-08	long-term care level2	1	0	1	1	0	1	0	0	0	0	0	0	0	0	0	0	0	0	0	0	0	0	0	0	0	0	0	0	1.6	50	19.5312	HT, dementia, gastric cancer, gastric urcer, hydrocephalus	0	1	1	1	0	0	0	1	8	pulmonology	pneumonia	12900	12.3
30	female	86	2021-03-08	requiring help1	1	0	1	1	0	1	0	0	0	0	0	0	0	0	0	0	0	0	1	0	0	0	0	0	0	0	0	0	1.56	40	16.4366	COPD, lung cancer	1	0	0	0	0	0	0	1	7	pulmonology	COPD exacerbation	7700	13.3
31	female	79	2021-03-17	long-term care level1	1	1	1	0	0	0	0	0	0	0	0	0	0	0	0	0	0	0	0	0	0	0	0	0	0	0	0	0	1.54	60	25.2994	CKD, HT, DM, dementia, anemia	0	1	1	0	1	1	0	0	7	nephrology	CKD exacerbation	5900	7.3
32	female	87	2021-03-17	long-term care level5	1	0	1	1	0	1	0	0	0	0	0	0	0	0	1	0	0	0	0	0	0	0	0	0	0	0	0	0	1.56	41	16.8475	CSDH, Cerebral hematoma, valve disease	0	1	1	0	0	0	0	0	5	pulmonology	pneumonia	18100	7.4
33	male	88	2021-04-15	long-term care level3	0	0	0	0	0	0	0	0	1	0	0	0	0	0	0	0	0	0	0	0	0	0	0	0	0	0	0	0	1.61	48.1	18.5564	dementia, HT, diverticulitis, cholecystitis	0	1	1	1	0	0	0	0	5	gastroenterology	diverticulum bleeding	4700	7.4
34	female	80	2021-12-21	long-term care level4	1	0	0	0	0	0	0	0	0	0	0	1	0	0	1	0	0	0	0	0	0	0	0	0	0	1	0	0	1.36	33.6	18.1661	DM, DL, stroke, parkinson, epilepsy	0	0	1	0	1	0	0	0	6	neurology	epilepsy	4700	16
35	female	76	2022-01-05	independence	1	0	0	0	0	0	0	1	0	0	0	0	0	0	1	0	0	0	0	0	0	0	0	0	0	1	0	0	1.57	65	26.3702	DM, CI s/p	0	0	1	0	1	0	0	0	5	endocrinology	DKA (+UTI s/p)	24900	11.3
36	female	95	2022-01-05	long-term care level3	0	0	0	0	0	0	1	0	0	0	0	0	0	0	0	0	0	0	0	0	0	0	0	0	0	1	0	0	1.48	42	19.1746	anemia, thrombocytopenia, gastric Ca, S-colon Ca, DM	0	0	0	1	1	0	0	1	7	gastroenterology	gastritis	9700	8.5
37	male	87	2022-01-07	independence	1	0	1	1	0	1	0	0	0	0	0	0	0	0	0	0	0	0	0	0	0	0	0	0	0	0	0	0	1.55	48	19.9792	DM	0	0	0	0	1	0	0	0	5	pulmonology	pneumonia	15900	8.8
38	male	67	2022-01-20	long-term care level5	1	1	1	0	0	0	0	0	0	0	0	0	0	0	1	0	0	0	0	0	0	0	0	0	0	0	0	0	1.6	40	15.625	DM, HT, cerebral stroke	0	1	1	0	1	0	0	0	5	pulmonology	pneumonia, UTI, hyperglycemia	19200	12.1
39	female	93	2022-02-02	long-term care level1	1	0	1	1	0	0	0	0	0	0	0	0	0	0	0	0	0	0	0	0	0	0	0	1	1	1	0	0	1.45	36	17.1225	OMI, CHF, cAf, asthma, ovarian tumor, pneumonia	1	1	0	0	0	0	0	1	9	pulmonology	pneumonia	11300	12.8
40	male	86	2022-02-03	independence	1	0	1	0	0	0	0	0	0	0	0	0	0	0	0	0	0	0	0	0	0	0	0	1	1	0	0	0	1.69	60	21.0077	Bladder tumor	0	0	0	0	0	0	0	1	6	others	COVID-19	11200	15.2
41	female	75	2022-02-04	long-term care level2	0	0	0	0	0	0	0	0	0	0	0	0	0	0	0	0	0	0	0	0	0	0	0	0	0	0	0	0	1.48	40	18.2615	Liver disorder, gastric Ca, anemia, dementia, stroke, CHF	0	1	1	0	0	0	0	1	8	others	COVID-19	5200	8.1
42	female	99	2022-02-24	long-term care level3	1	0	0	0	0	0	0	0	0	0	0	0	0	0	0	0	0	0	0	0	0	0	0	0	0	0	0	0	1.5	39	17.3333	COPD, CEDH, HT, Af	1	1	1	0	0	0	0	0	5	nephrology	UTI, Sepsis	6200	10.6
43	female	72	2022-02-28	long-term care level5	1	0	0	0	0	0	0	0	0	0	0	0	0	0	0	0	0	0	0	0	0	0	0	0	0	0	0	0	1.53	40	17.0874	SAH(VP shunt)	0	0	1	0	0	0	0	0	4	nephrology	UTI	8700	13.6
44	female	97	2022-03-15	long-term care level5	1	0	1	0	0	0	0	0	0	0	0	0	0	0	1	0	0	0	0	0	0	0	0	0	0	0	0	0	1.44	36.9	17.7951	RA, HT, CI, DM, gastric ulcer	0	1	1	1	1	0	1	0	8	endocrinology	Hyperglycemia, UTI, CKD	13400	8.5
45	female	85	2022-03-16	long-term care level3	1	0	0	0	0	0	0	0	0	0	0	0	0	0	0	0	0	0	0	0	0	0	0	1	1	1	0	0	1.33	33.8	19.1079	DVT, dementia	0	1	1	0	0	0	0	0	5	nephrology	UTI	9500	10.6
46	male	93	2022-04-06	long-term care level3	0	0	1	0	1	0	0	0	0	0	0	0	0	0	1	0	0	0	0	0	0	0	0	0	0	0	0	0	1.63	45	16.937	DM, HT, Af, CHF, ASO, dementia	0	1	1	0	1	0	0	0	8	cardiology	CHF, pneumonia, hyperglycemia	7400	8.7
47	male	74	2022-04-07	independence	1	0	1	0	0	0	0	0	0	0	0	0	0	0	0	0	0	0	0	0	0	0	0	0	0	0	1	0	1.64	74	27.5134	AR, HT, Prostate cancer	0	1	0	0	0	0	0	1	6	cardiology	Infective, endocarditis	13700	12.7
48	female	91	2022-05-24	long-term care level2	1	0	0	0	0	0	0	0	0	0	0	0	0	0	1	0	0	0	0	0	0	0	0	0	0	0	0	0	1.54	53	22.3478	dementia, HT, DL, GERD	0	1	1	0	1	0	0	0	5	others	non specific disturbance of consciousness	7700	11
49	female	98	2022-05-30	long-term care level5	1	0	0	0	0	0	0	1	0	1	0		0	0	0	0	0	0	0	0	0	0	0	0	0	0	0	0	1.4	40.8	20.8163	dementia, anemia, chronic peumonia	1	0	1	0	0	0	0	0	5	gastroenterology	Cholecystitis	16200	10.6
																																														others
																																														8
																																														100
																																														8
																																														100
[truncated: 40 more columns]

## Sheet: EWS
RR	SpO2	O2 supply(Yes：1、No：0)	Body temp	sBP	HR	Consciousness： A14-15, V9-13, P4-8, U3		RR score	SpO2 score	O2 score	BT score	BP score	HR score	Con score	NEWS					呼吸回数	RR Score	SpO2	SpO2 score	酸素投与	O2 score	体温	BT score	収縮期血圧	BP score	脈拍数	HR score	意識覚醒	Con score
30	96	1	37.1	60	108	P		3	0	2	0	3	1	3	12		0			0	3	0	3	1	2	0	3	0	3	0	3	A	0			A
18	94	1	37.1	166	75	A		0	1	2	0	0	0	0	3		1			9	1	92	2	0	0	35.1	1	91	2	41	1	V	3			V
12	95	0	37	119	81	A		0	1	0	0	0	0	0	1					12	0	94	1	有：1		36.1	0	101	1	51	0	P	3			P
24	99	1	36.2	188	71	A		2	0	2	0	0	0	0	4					21	2	96	0	無：0		38.1	1	111	0	91	1	U	3			U
24	92	1	37.5	141	78	A		2	2	2	0	0	0	0	6					25	3					39.1	2	220	3	111	2
18	97	0	38.1	71	63	A		0	0	0	1	3	0	0	4															131	3
28	95	1	38.2	88	90	A		3	1	2	1	3	0	0	10
24	96	1	36.6	147	139	V		2	0	2	0	0	3	3	10					呼吸回数	RR Score	体温	BT score	収縮期血圧	BP score	脈拍数	HR score	意識覚醒	Con score
24	99	1	36.3	220	41	A		2	0	2	0	3	1	0	8					0	2	0	2	0	3	0	2	A	0
35	98	0	37.9	171	96	A		3	0	0	0	0	1	0	4					9	1	35.1	0	71	2	40	1	V	1
18	95	0	37	157	66	V		0	1	0	0	0	0	3	4					10	0	38.5	2	81	1	51	0	P	2
24	98	1	39.2	95	71	V		2	0	2	2	2	0	3	11					19	1			101	0	101	1	U	3
18	98	1	35.3	103	63	V		0	0	2	1	1	0	3	7					21	2			200	2	111	2
24	99	0	36.9	98	88	A		2	0	0	0	2	0	0	4					30	3					130	3
18	100	1	36.2	126	60	A		0	0	2	0	0	0	0	2
29	90	1	38.5	146	134	A		3	3	2	1	0	3	0	12
24	93	0	35.7	133	116	A		2	2	0	1	0	2	0	7
50	100	0	36.6	161	82	V		3	0	0	0	0	0	3	6
24	97	1	37.3	143	102	A		2	0	2	0	0	1	0	5
18	98	1	37.1	144	113	A		0	0	2	0	0	2	0	4
18	97	0	36.7	180	82	A		0	0	0	0	0	0	0	0
18	97	0	37.4	121	97	V		0	0	0	0	0	1	3	4
18	100	1	36.4	115	142	A		0	0	2	0	0	3	0	5
18	98	0	35.9	110	100	A		0	0	0	1	1	1	0	3
16	98	0	35.9	160	52	A		0	0	0	1	0	0	0	1
18	97	0	36.6	180	84	A		0	0	0	0	0	0	0	0
13	97	0	36	149	63	V		0	0	0	1	0	0	3	4
22	98	1	38.3	116	100	V		2	0	2	1	0	1	3	9
24	93	1	37.4	164	93	A		2	2	2	0	0	1	0	7
23	99	1	37.2	154	105	A		2	0	2	0	0	1	0	5
18	90	1	37.2	112	120	A		0	3	2	0	0	2	0	7
24	87	0	37.6	138	84	P		2	3	0	0	0	0	3	8
12	97	0	36.2	92	82	A		0	0	0	0	2	0	0	2
18	97	0	36.9	116	52	P		0	0	0	0	0	0	3	3
21	99	0	34.6	116	103	V		2	0	0	3	0	1	3	9
18	100	0	36.8	125	67	A		0	0	0	0	0	0	0	0
24	97	0	35.9	146	66	A		2	0	0	1	0	0	0	3
30	96	1	37.4	90	119	P		3	0	2	0	3	2	3	13
24	98	0	38	103	91	A		2	0	0	0	1	1	0	4
18	95	0	38.2	162	65	A		0	1	0	1	0	0	0	2
18	99	0	36	132	68	A		0	0	0	1	0	0	0	1
25	97	0	39.3	145	95	V		3	0	0	2	0	1	3	9
24	91	0	38	112	102	V		2	3	0	0	0	1	3	9
18	95	0	37.7	103	76	P		0	1	0	0	1	0	3	5
20	97	0	36.9	114	63	V		0	0	0	0	0	0	3	3
18	95	1	36.1	169	95	V		0	1	2	0	0	1	3	7
18	93	0	38.7	116	75	A		0	2	0	1	0	0	0	3
18	98	0	37.2	122	72	A		0	0	0	0	0	0	0	0
18	96	0	37.3	104	58	V		0	0	0	0	1	0	3	4
